# Supplementary material for: Post-translational site-selective protein backbone α-deuteration
Source: Springer Nature journal article supplement (doi:10.1038/s41589-018-0128-y), 2018-09-11
Supplement: MOESM39 [file 41589_2018_128_MOESM39_ESM.pdf]

In the format provided by the authors and unedited.

# Post-translational site-selective protein backbone $\alpha$ -deuteration

Sébastien R. G. Galan<sup>1</sup>, James R. Wickens<sup>1</sup>, Jitka Dadova<sup>1</sup>, Wai-Lung Ng<sup>1</sup> , Xinglong Zhang<sup>1</sup> ,  
Robert A. Simion<sup>1</sup>, Robert Quinlan<sup>1</sup>, Elisabete Pires<sup>1</sup>, Robert S. Paton<sup>1,2</sup> , Stephen Caddick<sup>3</sup>,  
Vijay Chudasama<sup>3\*</sup> and Benjamin G. Davis<sup>1\*</sup> 

---

<sup>1</sup>Chemistry Research Laboratory, Department of Chemistry, University of Oxford, Oxford, UK. <sup>2</sup>Department of Chemistry, Colorado State University, Fort Collins, CO, USA. <sup>3</sup>Department of Chemistry, University College London, London, UK. \*e-mail: [v.chudasama@ucl.ac.uk](mailto:v.chudasama@ucl.ac.uk); [Ben.Davis@chem.ox.ac.uk](mailto:Ben.Davis@chem.ox.ac.uk)

| Structure                 | E/au         | ZPE/au   | H/au         | Qh-G/au      | Imaginary Freq/cm <sup>-1</sup> |
|---------------------------|--------------|----------|--------------|--------------|---------------------------------|
| Intramolecular pathway:   |              |          |              |              |                                 |
| Starting complex          | -1463.804556 | 0.361782 | -1463.417309 | -1463.493081 | -                               |
| Deprotonation TS          | -1463.774236 | 0.355911 | -1463.392496 | -1463.468716 | -932.184                        |
| Sulfonium ylid            | -1463.796078 | 0.361477 | -1463.408186 | -1463.486067 | -                               |
| Intramolecular deprot. TS | -1463.769112 | 0.354586 | -1463.387347 | -1463.466589 | -1167.357                       |
| Product                   | -1463.837479 | 0.359888 | -1463.449591 | -1463.531014 | -                               |
| E2-elimination pathway:   |              |          |              |              |                                 |
| Starting complex          | -1463.79543  | 0.361028 | -1463.408127 | -1463.485822 | -                               |
| E2-elimination TS         | -1463.763324 | 0.355009 | -1463.381935 | -1463.459659 | -1262.9813                      |
| Product                   | -1463.844519 | 0.360551 | -1463.456635 | -1463.536136 | -                               |

Supplementary Table 3. Absolute values (Hartrees) for SCF energy, zero-point vibrational energy (ZPE), enthalpy and free energy (at 298K) for the lowest energy structures.

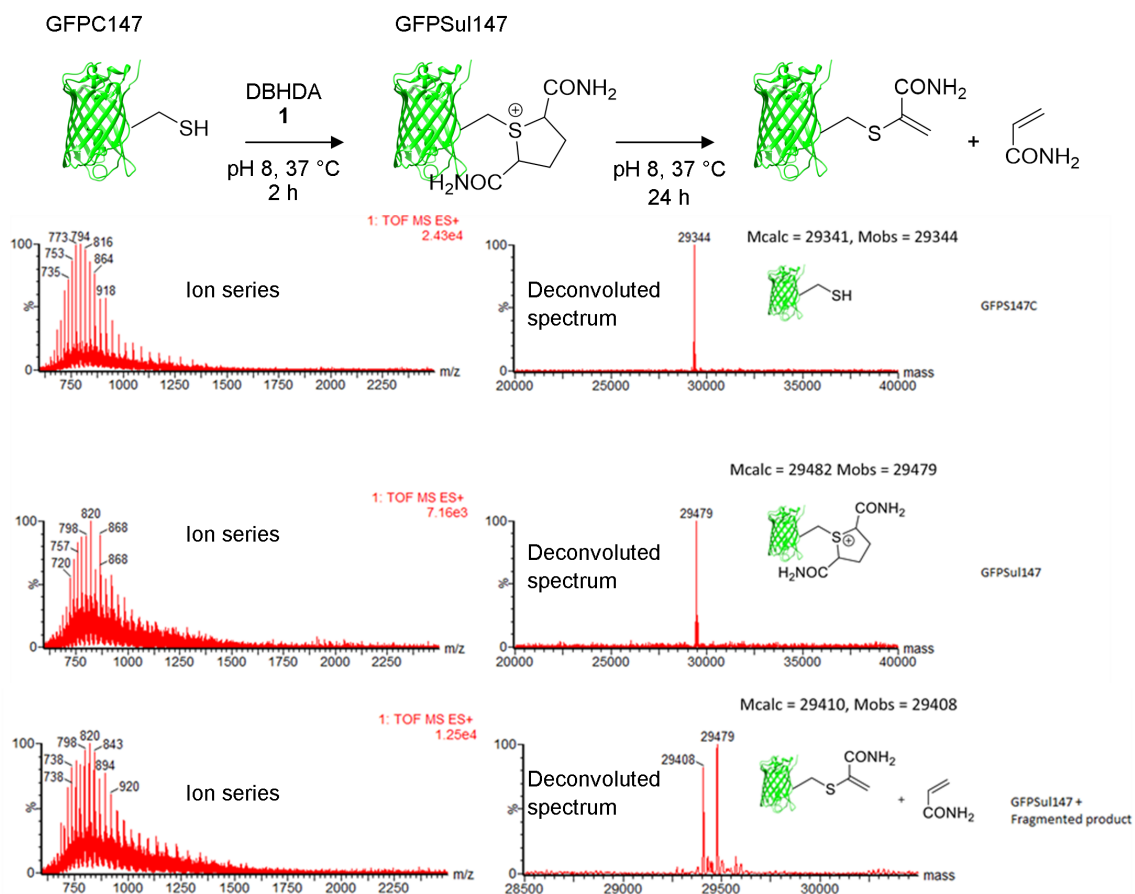

Supplementary Figure 19. Formation of GFPSul147 monitored by LCMS and Identification of Fragmentation Products. The experiments were repeated independently three times with similar results.

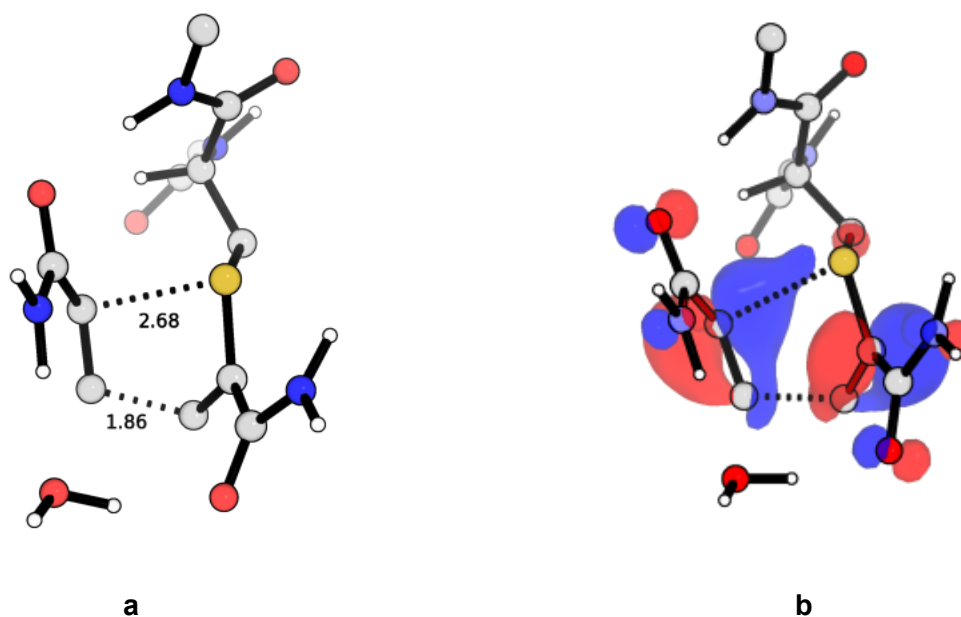

Supplementary Figure 20 (a) Left: Lowest energy TS for sulfonium ylid decomposition via concerted [3+2] cycloreversion. Bond distances are given in Å. (b) Right: The corresponding HOMO (at an isovalue of 0.05) for this lowest energy TS, indicating a concerted electron movement, with dominant electron density on the ylid carbon and the  $\alpha$ -carbon of the acylamide fragment, as the cycloreversion occurs.

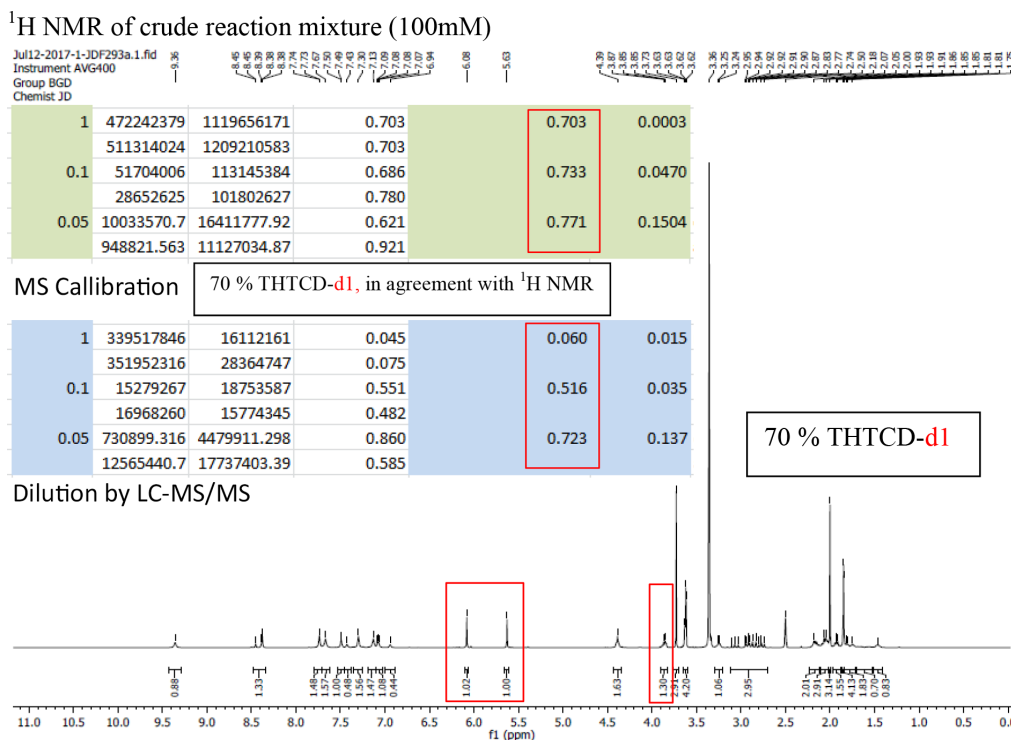

Supplementary Figure 29. Dilution experiments were also performed to explore the effect of concentration upon incorporation as a proxy for relative rate of intra- vs inter- molecular alpha-deuteron abstraction. D-AcNHCysOMe-d1 **4** (17.7 mg, 0.1 mmol), DBHDA (30.2 mg, 0.1 mmol) and potassium carbonate (41 mg, 0.3 mmol) were dissolved in DMSO-d6 (1 mL) to give 100mM AcCysOMe-d1 and DBHDA stock solution. A series of sequential dilutions (1mM, 0.1mM, 0.05mM, 0.01mM; final volume 200  $\mu$ L of each reaction mixture) in DMSO-d6 were prepared immediately. All reactions were incubated at 25  $^{\circ}$ C and 300 rpm for 1 hour and then at 37  $^{\circ}$ C and 300 rpm for 5 hours. Formation of AcNHDhaOMe and THTCD-d1 was confirmed by <sup>1</sup>H NMR of crude reaction mixture (100mM). The ratio of THTCD-d1 and THTCD was determined by LC/MS-MS analysis. <sup>1</sup>H NMR was also used to confirm incorporation correlations and estimate associated precision. The experiments were repeated independently twice with similar results.

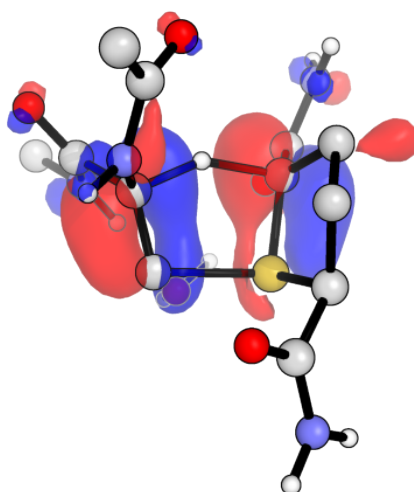

Supplementary Figure 30. HOMO (at an isovalue of 0.05) for the lowest energy intramolecular deprotonation TS, indicating a concerted electron movement as the deprotonation step occurs.

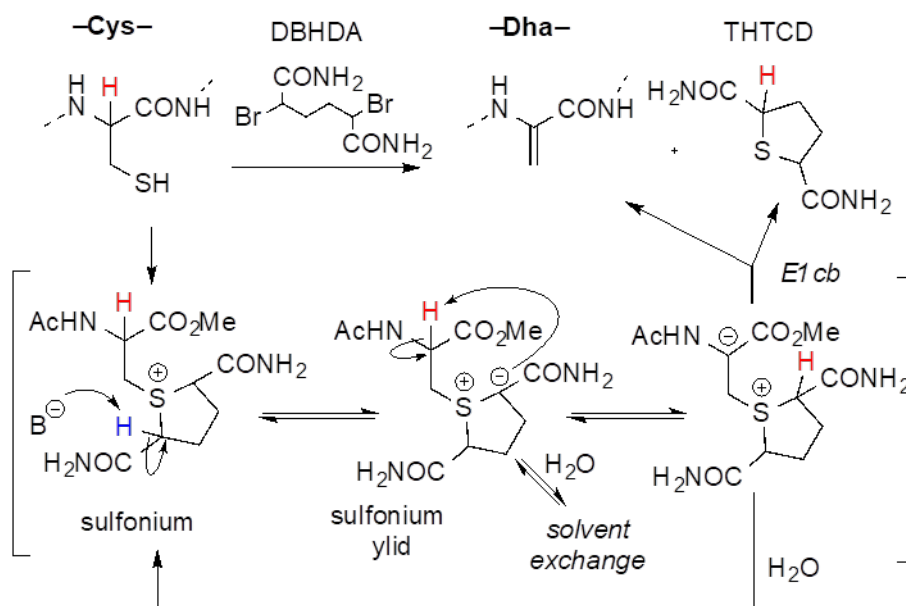

Supplementary Figure 31. Summary of Proposed Mechanism
